# Supplementary material for: Ellagic Acid and Urolithins A and B Differentially Regulate Fat Accumulation and Inflammation in 3T3-L1 Adipocytes While Not Affecting Adipogenesis and Insulin Sensitivity
Source: PubMed Central journal article supplement (PMC7139477; doi:10.3390/ijms21062086), 2020-03-18
Supplement: ijms-21-02086-s001.pdf [file ijms-21-02086-s001.pdf]

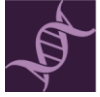

Supplementary Materials:

## **Ellagic Acid and Urolithins A and B Differentially Regulate Fat Accumulation and Inflammation in 3T3-L1 Adipocytes While Not Affecting Adipogenesis and Insulin Sensitivity**

**Luis Cisneros-Zevallos** <sup>1,2,\*</sup>, **Woo Young Bang** <sup>1</sup> and **Claudia Delgadillo-Puga** <sup>3</sup>

<sup>1</sup> Department of Horticultural Sciences, Texas A&M University, College Station, TX 77843-2133, USA; wybang@gmail.com

<sup>2</sup> Department of Nutrition and Food Science, Texas A&M University, College Station, TX 77843, USA

<sup>3</sup> Departamento de Nutrición Animal Dr. Fernando Pérez-Gil Romo, Instituto Nacional de Ciencias Médicas y Nutrición Salvador Zubirán (INCMNSZ), CDMX 14080, Mexico; claudia.delgadillo@incmnsz.mx

\* Correspondence: lcisnero@tamu.edu; Tel.: +1-979-845-3244

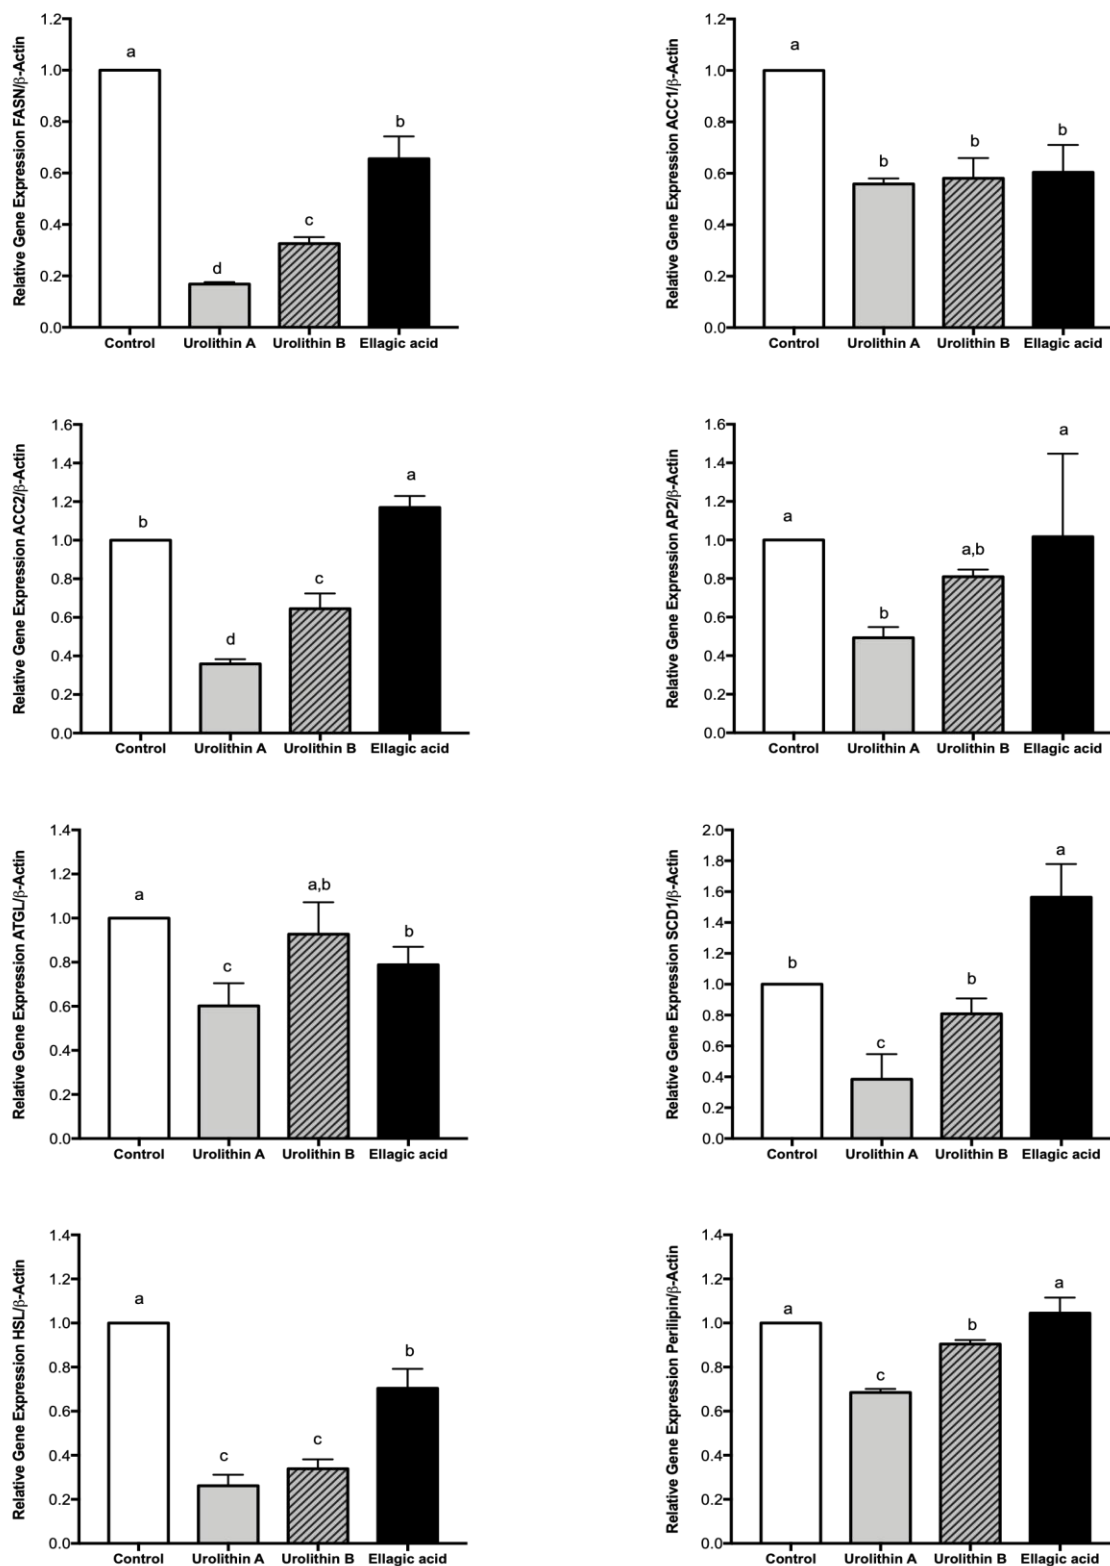

**Figure S1.** Gene expression of lipogenic (FASN, ACC1, ACC2, AP2, and SCD1) and lipolytic (HSL, ATGL and Perilipin) enzymes in mature 3T3-L1 adipocytes after 8-day treatment with 25  $\mu$ M of urolithins A and B and ellagic acid. Gene expression was evaluated by RT-PCR as described in the Materials and Methods section. The values represent the mean  $\pm$  S.D. ( $n = 3$ ) of three independent experiments. Different letters among bars denote significant changes among treatments and control ( $p \leq 0.05$ ) performed by ANOVA and Tukey's post hoc test.

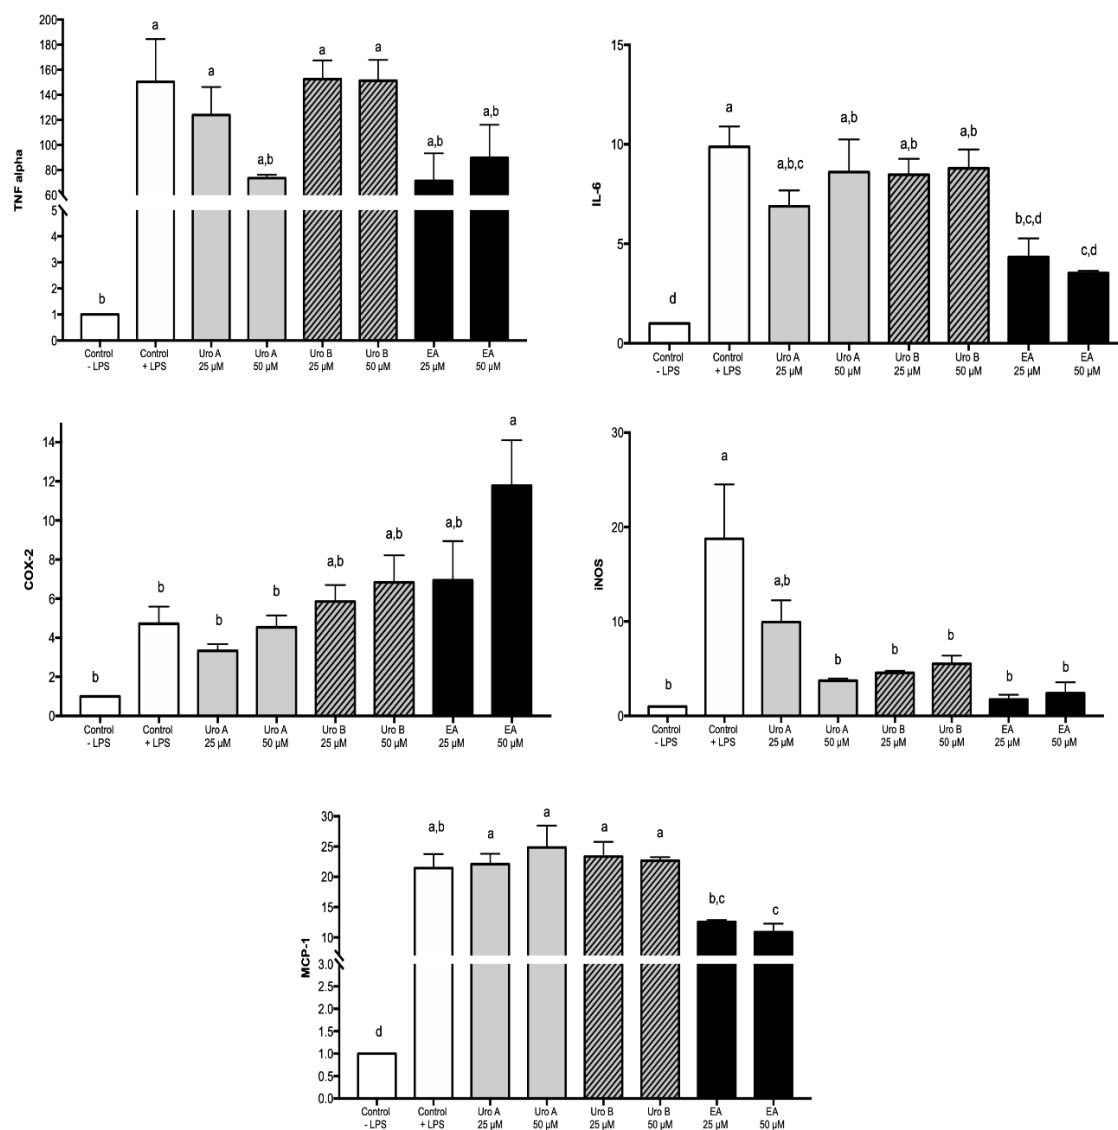

**Figure S2.** Gene expression of pro-inflammatory genes (TNF- $\alpha$ , IL-6, COX-2, iNOS and MCP-1) in LPS challenged mature 3T3-L1 adipocytes. Cells were treated with urolithins A and B and ellagic acid at concentrations of 25  $\mu$ M and 50  $\mu$ M, at day 8 for 24h and then exposed 1h to LPS (100 ng/mL). Gene expression was determined by RT-PCR as described in the Materials and Methods section. The values represent the mean  $\pm$  S.D. ( $n = 3$ ) of three independent experiments conducted in duplicate. Different letters among bars denote significant changes among treatments and control ( $p \leq 0.05$ ) performed by ANOVA and Tukey's post hoc test.
